# Supplementary material for: Isolation and characterization of centromeric repetitive DNA sequences in Saccharum spontaneum
Source: PubMed Central journal article supplement (PMC5278356; doi:10.1038/srep41659), 2017-01-30
Supplement: srep41659-s1.pdf [file srep41659-s1.pdf]

SUPPLEMENTARY INFORMATION

**Isolation and characterization of centromeric repetitive  
DNA sequences in *Saccharum spontaneum***

Wenpan Zhang, Sheng Zuo, Zhanjie Li, Zhuang Meng, Jinlei Han, Junqi Song,  
Yong-Bao Pan, Kai Wang

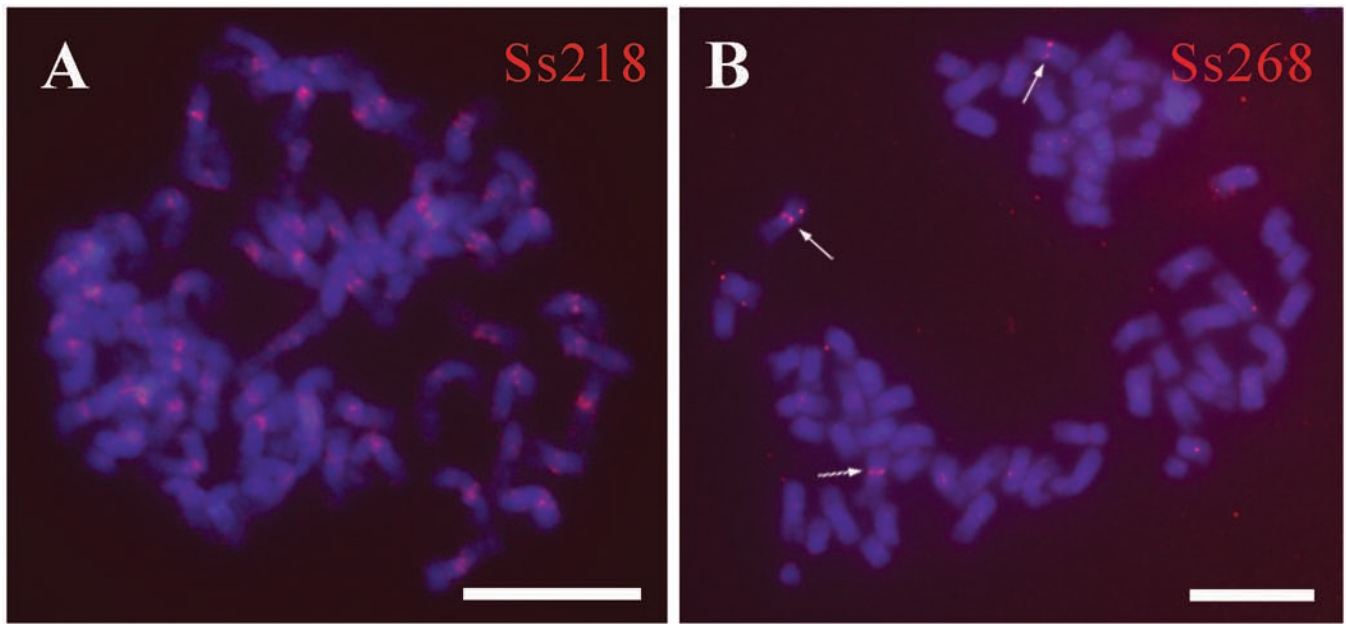

Figure S1. FISH mapping of repeats Ss218 and Ss268.

(A) Signals from Ss218 probe are concentrated in the centromeres in clone SES208. However, signals from pericentromeric or interstitial regions can also be detected. (B) Weak and dispersed FISH signals were detected from Ss268 probe. Signals located in the centromeric regions are indicated by arrows.

Bar = 10  $\mu$ m

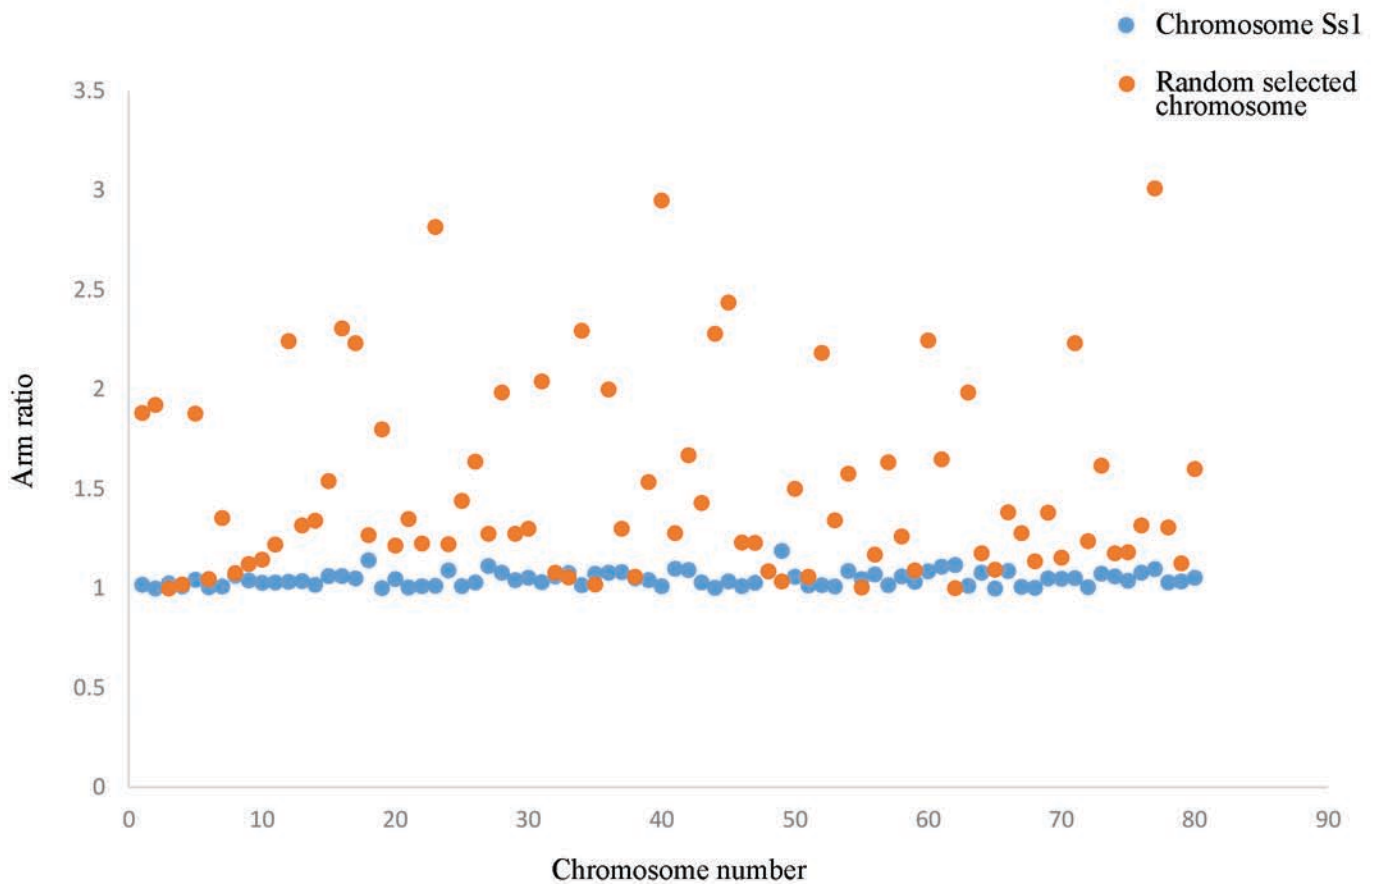

Figure S2. Arm ratios of repeat Ss1 between brighter signal-bearing chromosomes and randomly selected chromosomes of clone SES208.

Arm length of the eight brighter Ss1 signal-bearing chromosomes and eight randomly selected chromosomes ( $n = 80$ ) were measured, and long arm/short arm ratios were calculated and are represented by dots. The arm ratios of the brighter Ss1 signal-bearing chromosomes are almost consistent across the 80 measurements. In contrast, the arm ratios of the randomly selected chromosomes vary across a wide range. This reveals that the brighter Ss1 signal-bearing chromosomes have consistent morphology and should belong to a homologous set of eight chromosomes.

Table S1 PCR primers used in the amplification and isolation of centromeric repeats.

| Repeat contig | Primer | Primer sequence (5'-3') | Length (bp) | Tm (°C) | GC (%) | Amplicon size (bp) |
|---------------|--------|-------------------------|-------------|---------|--------|--------------------|
| Ss166         | WL063F | TCCTTGCTTTAGCCACCT      | 19          | 57.3    | 52.6   | 665                |
|               | WL063R | GCATTCATCCAATCCACCA     | 19          | 56.7    | 47.4   |                    |
| Ss 51         | WL067F | AGGTGGTGTATCGGTTGCTAA   | 21          | 57.4    | 47.6   | 782                |
|               | WL067R | TTGGGAAGGGTGATTCAGTAG   | 21          | 56.8    | 47.6   |                    |
| Ss 262        | WL058F | GGAAACGGAGGCTTTGATAC    | 20          | 56.5    | 50.0   | 616                |
|               | WL058R | ATACAAGGAGTTAGACGGTGCT  | 22          | 55.4    | 45.5   |                    |
| Ss 68         | WL060F | GACTAAGAGACTCACGCACA    | 20          | 50.3    | 50.3   | 697                |
|               | WL060R | CCACATCCCCATCCCTA       | 17          | 53.3    | 53.3   |                    |
| Ss1           | WL081F | CAGCTAGGAGAACCATCGAGT   | 21          | 56.2    | 52.4   | 387                |
|               | WL081R | TCAGCCATACGGAGAAAC      | 19          | 55.6    | 52.6   |                    |
| Ss268         | WL066F | GCTCATCCAAGCAAAGTCA     | 19          | 53.9    | 47.4   | 214                |
|               | WL066R | TCTCTATGTCCTCTACTTTCTCG | 23          | 53.1    | 43.5   |                    |
| Ss218         | WL059F | AGCCACCCTTCCCCTAT       | 17          | 53.6    | 58.8   | 185                |
|               | WL059R | CCTCATCATTCCCACCC       | 17          | 52.6    | 58.8   |                    |
| Ss242         | WL082F | CAGCACAAGTAGACCATAGC    | 20          | 50.6    | 50.0   | 181                |
|               | WL082R | ACAGGTTGAAGGGAAAATAC    | 20          | 51.0    | 40.0   |                    |
| Ss53          | WL086F | GCTGAATCGCCATAGACAAG    | 20          | 55.8    | 50.0   | 253                |
|               | WL086R | GGACAGAAATCCAACAACCC    | 20          | 56.5    | 50.0   |                    |
| Ss203         | WL092F | CCCTCTTCATCTACCAAAC     | 20          | 51.3    | 45.0   | 483                |
|               | WL092R | ATTCCATCTAAGTGCCGTC     | 20          | 51.2    | 45.0   |                    |
| Ss279         | WL095F | ATCGCTATTCCACCTTTTA     | 19          | 50.2    | 36.8   | 214                |
|               | WL095R | GACTACTGGCGGTTTCAT      | 18          | 49.9    | 50.0   |                    |

Table S2. Measurements of fiber-FISH signals from centromeric repeats.

| <b>Repeat</b>    | <b>Fibers</b>  | <b>Fiber length<br/>(<math>\mu\text{m}</math>)</b> | <b>Fiber length<br/>(kb)*</b> |
|------------------|----------------|----------------------------------------------------|-------------------------------|
| <b>Ss1</b>       | 1              | 181.42                                             | 587.81                        |
|                  | 2              | 180.76                                             | 585.65                        |
|                  | 3              | 174.12                                             | 564.15                        |
|                  | 4              | 171.22                                             | 554.75                        |
|                  | 5              | 144.42                                             | 467.93                        |
|                  | 6              | 143.00                                             | 463.32                        |
|                  | 7              | 139.94                                             | 453.41                        |
|                  | 8              | 134.53                                             | 435.89                        |
|                  | 9              | 133.21                                             | 431.61                        |
|                  | 10             | 132.01                                             | 427.70                        |
|                  | <b>Average</b> | <b>153.46</b>                                      | <b>497.22</b>                 |
| <b>Ss68+Ss51</b> | 1              | 124.03                                             | 401.86                        |
|                  | 2              | 115.72                                             | 374.93                        |
|                  | 3              | 76.12                                              | 246.63                        |
|                  | 4              | 75.88                                              | 245.85                        |
|                  | 5              | 39.84                                              | 129.08                        |
|                  | 6              | 35.83                                              | 116.09                        |
|                  | 7              | 23.41                                              | 75.85                         |
|                  | 8              | 19.76                                              | 64.02                         |
|                  | 9              | 17.36                                              | 56.25                         |
|                  | 10             | 13.81                                              | 44.74                         |
|                  | 11             | 9.79                                               | 31.72                         |
|                  | 12             | 9.40                                               | 30.46                         |
|                  | 13             | 7.04                                               | 22.81                         |
|                  | 14             | 7.03                                               | 22.78                         |
|                  | 15             | 5.98                                               | 19.38                         |
|                  | 16             | 4.19                                               | 13.58                         |
|                  | 17             | 3.26                                               | 10.56                         |
|                  | 18             | 2.80                                               | 9.07                          |
|                  | 19             | 1.53                                               | 4.96                          |
|                  | <b>Average</b> | <b>31.20</b>                                       | <b>101.08</b>                 |

\* A conversion rate of 3.24 Kb/ $\mu\text{M}$  (Wang et al. 2013) was used to convert the measurements.
